# Supplementary material
Source: PubMed Central journal article supplement (PMC8119039)
Supplement: tables1161.pdf [file tables1161.pdf]

**On-line Table 1. Studies comparing perfusion imaging findings with clinical outcome (Category 2)**

| Citation (reference number)             | No. of Patients | Image Acquisition Parameter | Analysis Technique | Comparator or Adjunct Test | Outcome Measure                          |
|-----------------------------------------|-----------------|-----------------------------|--------------------|----------------------------|------------------------------------------|
| Warach et al, 1996 <sup>13</sup>        | 12              | T2*-WI                      | TTP                | DWI                        | NIHSS, RS                                |
| Chalela et al, 2000 <sup>7</sup>        | 15              | CASL-PI                     | CBF                | CVF literature values      | NIHSS<br>RS                              |
| Kluytmans et al, 2000 <sup>11</sup>     | 38              | T2*-WI                      | MTT, CBV           | Final infarct size         | NIHSS, Barthel index RS                  |
| Schellinger et al, 2000 <sup>15</sup>   | 20              |                             |                    | None                       | FIS                                      |
| Warach et al, 2000 <sup>14</sup>        | 81              | T2*WI                       | MTT                | None                       | NIHSS, FIS                               |
| Bruening et al, 2001 <sup>18</sup>      | 24              | T2*-WI                      | CBV, CBF, MTT      | None                       | MMSE<br>RS                               |
| Hillis et al, 2001 <sup>21</sup>        | 50              | Not reported                | TIP                | None                       | Word comprehension errors                |
| Lev et al, 2001 <sup>5</sup>            | 22              | CT perfusion                | CBV                | CTA                        | NIHSS, FIS                               |
| Rohl et al, 2001 <sup>25</sup>          | 22              | T2*-WI                      | MTT                | DWI                        | Scandinavian stroke scale, Barthel index |
| Arenillas et al, 2002 <sup>16</sup>     | 30              | T2*-WI                      | TTP                | IS                         | NIHSS<br>Rankin                          |
| Parsons et al, 2002 <sup>24</sup>       | 19              | T2*-WI                      | MTT                | DWI                        | IS                                       |
| Uno et al, 2002 <sup>27</sup>           | 10              | ASL                         | CBF                | DWI, NIHSS                 | IS                                       |
| Wintermark et al, 2002 <sup>6</sup>     | 22              | CT perfusion                | CBV, CBF, MTT      | MRA                        | NIHSS, FIS                               |
| Hermier et al, 2003 <sup>19</sup>       | 28              | T2*-WI                      | TTP                | DWI                        | NIHSS, FIS                               |
| Nighoghossian et al, 2003 <sup>23</sup> | 29              | T2*-WI                      | CBV, TTP           | IS                         | NIHSS                                    |
| Barber et al, 2004 <sup>17</sup>        | 23              | T2*-WI                      | MTT                | None                       | NIHSS                                    |
| Dereix et al, 2004 <sup>8</sup>         | 49              | T2*-WI                      | TTP                | DWI, NIHSS                 | NIHSS                                    |
| Hillis et al, 2004 <sup>20</sup>        | 10              | T2*-WI                      | TTP                | None                       | NIHSS: reduction of 3+ points            |
| Liu et al, 2004 <sup>22</sup>           | 39              | T2*-WI                      | CBV                | MRA                        | NIHSS                                    |
| Singer et al, 2004 <sup>26</sup>        | 17              | T2*-WI                      | TTP                | None                       | PET                                      |
| Yamada et al, 2004 <sup>28</sup>        | 26              | CT perfusion                | MTT, CBV, CBF      | None                       | NIHSS                                    |
| Hacke et al, 2005 <sup>10</sup>         | 104             | T2*-WI                      | MTT                | None                       | NIHSS                                    |
| Perkiö et al, 2005 <sup>12</sup>        | 10              | T2*-WI                      | MTT, CBV, FLHET    | None                       | IS, NIHSS                                |
| Albers et al, 2006 <sup>3</sup>         | 74              | DSC, MRA, GRE               | MTT                | DWI, lesion volume         | NIHSS, mRS, TOAST                        |
| Furlan et al, 2006 <sup>9</sup>         | 37              | T2*-WI                      | MTT                | None                       | Reperfusion infarct size, NIHSS          |
| Davis et al, 2008 <sup>4</sup>          | 101             | T2*-WI                      | TTP                | DWI                        | NIHSS, mRS                               |

**Note:**—ASL indicates arterial spin-labeling; CASL-PI, continuous arterial spin-labeling perfusion imaging; CBF, cerebral blood flow; CBV, cerebral blood volume; DSC, dynamic susceptibility contrast MR imaging; DWI, diffusion-weighted imaging; FLHET, cerebral blood flow heterogeneity; GRE, gradient recalled-echo; FIS, final infarct size; MMSE, Mini-Mental State Examination; MRA, MR angiography; mRS, modified Rankin Scale; MTT, mean transit time; NIHSS, National Institutes of Health Stroke Scale; PET, positron-emission tomography; PWI, perfusion-weighted imaging; RS, Rankin Scale; T2\*-WI – T2\* weighted imaging; TOAST, Trial of Org 10172 in Acute Stroke Treatment stroke subtype classification; TTP, time to peak; CTA, CT angiography.

**On-line Table 2. Studies comparing perfusion imaging findings with final infarct size on subsequent imaging studies (Category 3)**

| Citation (reference number)          | No. of Patients | Image Acquisition Parameter | Analysis Technique | Comparator or Adjunct Test  | Outcomes                         |
|--------------------------------------|-----------------|-----------------------------|--------------------|-----------------------------|----------------------------------|
| Warach et al, 2000 <sup>14</sup>     | 81              | T2*WI                       | MTT                | None                        | FIS                              |
| Lev et al, 2001 <sup>5</sup>         | 22              | CT perfusion                | CBV                | CTA                         | FIS                              |
| Eastwood et al, 2002 <sup>30</sup>   | 12              | CT perfusion                | CBV, CBF, MTT      | None                        | FIS                              |
| Schaefer et al, 2002 <sup>43</sup>   | 81              | T2*WI                       | CBV, CBF, MTT      | DWI                         | FIS                              |
| Fiehler et al, 2002 <sup>41</sup>    | 32              | T2*WI                       | CBV                | DWI                         | FIS                              |
| Grandin et al, 2002 <sup>42</sup>    | 66              | T2*WI                       | CBV, CBF, MTT      | DWI                         | FIS                              |
| Wintermark et al, 2002 <sup>6</sup>  | 22              | CT perfusion                | CBV, CBF, MTT      | MRA                         | FIS                              |
| Butcher et al, 2003 <sup>38</sup>    | 35              | T2*WI                       | CBV, MTT           | Infarct vs. salvaged tissue | FIS                              |
| Hermier et al, 2003 <sup>19</sup>    | 28              | T2*WI                       | TTP                | DWI                         | FIS                              |
| Thomalla et al, 2003 <sup>40</sup>   | 10              | T2*WI                       | TTP                | DWI                         | FIS                              |
| Shih et al, 2003 <sup>44</sup>       | 14              | T2*WI                       | MTT                | None                        | FIS                              |
| Schaefer et al, 2003 <sup>33</sup>   | 30              | T2*WI                       | CBV, CBF           | DWI                         | FIS                              |
| Schramm et al, 2004 <sup>39</sup>    | 22              | CT perfusion                | CBV, CBF, TTP      | MR perfusion                | FIS                              |
| Alsop et al, 2005 <sup>29</sup>      | 20              | T2*WI                       | CBV, CBF, MTT      | None                        | Hemorrhage on follow-up MR or CT |
| Kim et al, 2005 <sup>31</sup>        | 55              | T2*WI                       | CBV, CBF, MTT      | DWI                         | Hemorrhage on follow-up MR or CT |
| Murphy et al, 2006 <sup>32</sup>     | 25              | CT perfusion                | CBV, CBF           | CTA                         | FIS                              |
| Schaefer et al, 2006 <sup>34</sup>   | 14              | CT perfusion                | CBV, CBF           | None                        | FIS                              |
| Wintermark et al, 2006 <sup>36</sup> | 130             | CT perfusion                | CBV, CBF, MTT, TTP | None                        | FIS                              |
| Wu et al, 2006 <sup>37</sup>         | 38              | T2*WI                       | CBV, CBF, MTT      | DWI                         | FIS                              |
| Tan et al, 2007 <sup>35</sup>        | 113             | CT perfusion                | CBV, MTT           | CTA                         | FIS                              |

**Note:**—CBV indicates cerebral blood volume; CBF, cerebral blood flow; CTA, CT angiography; DWI, diffusion-weighted imaging; FIS, final infarct size; MRA, MR angiography; MTT, mean transit time; TTP, time to peak; T2\*WI-T2\*-weighted imaging.
